# Supplementary material for: Synthesis of nitrogen-functionalized macroporous carbon particles via spray pyrolysis of melamine-resin
Source: Royal Society of Chemistry journal article supplement (doi:10.1039/c6ra15217a), 2016-01-01
Supplement: c6ra15217a1.pdf [file c6ra15217a1.pdf]

## Electronic Supplementary Information

### Synthesis of nitrogen-functionalized macroporous carbon particles *via* spray pyrolysis of melamine-resin

Aditya F. Arif, Yohei Chikuchi, Ratna Balgis, Takashi Ogi, Kikuo Okuyama

*Department of Chemical Engineering, Graduate School of Engineering, Hiroshima University,*

*1-4-1 Kagamiyama, Higashi-Hiroshima 739-8527, Japan. E-mail: [ogit@hiroshima-u.ac.jp](mailto:ogit@hiroshima-u.ac.jp)*

#### 1. Comparison of the nitrogen content in melamine-derived carbon

**Table S1.** Summary of the nitrogen content in melamine-derived carbon synthesized *via* liquid  
phase routes

| No | Carbonization temperature (°C) | Atmosphere      | Heating rate (°C min <sup>-1</sup> ) | Holding time (h) | N-content (%) | Note                       | Ref. |
|----|--------------------------------|-----------------|--------------------------------------|------------------|---------------|----------------------------|------|
| 1  | 700                            | NH <sub>3</sub> | Unknown                              | 1.5              | 4.1           | 8 h for template removal   | 1    |
| 2  | 700                            | N <sub>2</sub>  | 7.5                                  | 1                | 4.0           | -                          | 2    |
| 3  | 600                            | Unknown         | 10                                   | 10               | 0.67          | -                          | 3    |
| 4  | 600                            | N <sub>2</sub>  | 2                                    | 1.5              | 4.12          | 0.5 h for template removal | 4    |
| 5  | 700                            | N <sub>2</sub>  | 10                                   | 1                | 19            | -                          | 5    |

#### 2. Estimation of double layer thickness and $\zeta$ -potential distribution

The droplets system is a mixture between charged melamine-resin oligomer and charged PSL particles. Therefore, we may assume that the system is highly charged. The colloidal system is

then simplified as an electrolyte system where the following equation applies to estimate the double layer thickness ( $x$ ).

$$x = \frac{1}{\kappa} \quad \text{S.1}$$

$$\kappa = \left( \frac{2000F^2}{\varepsilon_0 DRT} \right)^{1/2} \sqrt{I} \quad \text{S.2}$$

$F$  is the Faraday constant and  $R$  is the gas constant per mole.  $D$  is the relative permittivity and  $\varepsilon_0$  is the permittivity of free space. The ionic strength,  $I$ , is defined as

$$I = \frac{1}{2} \sum c_i z_i^2 \quad \text{S.3}$$

$c$  and  $z$  is concentration and ionic valence (=1), respectively.

The potential at a distance of  $h$ ,  $E_h$ , from the PSL surface is estimated from the following equation.

$$E_h = E_0 e^{(-\kappa h)} \quad \text{S.4}$$

where  $E_0$  is the  $\zeta$ -potential at the surface of PSL. The potential distribution is illustrated in Figure S1.

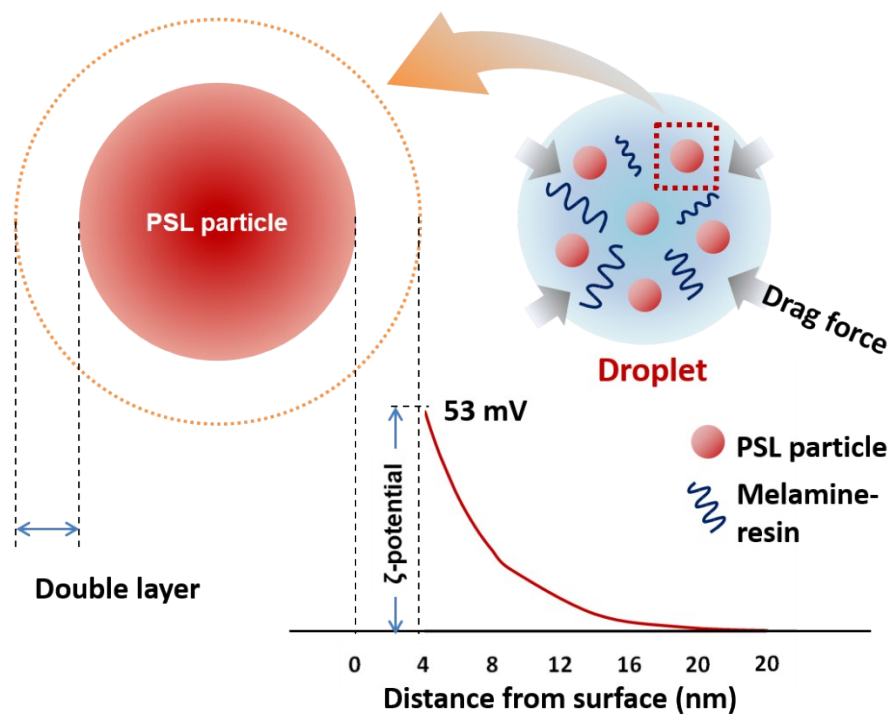

Figure S1. Illustration of the  $\zeta$ -potential distribution around the PSL particles and the direction of drag force due to the water evaporation

### 3. Barrett-Joyner-Halenda analysis

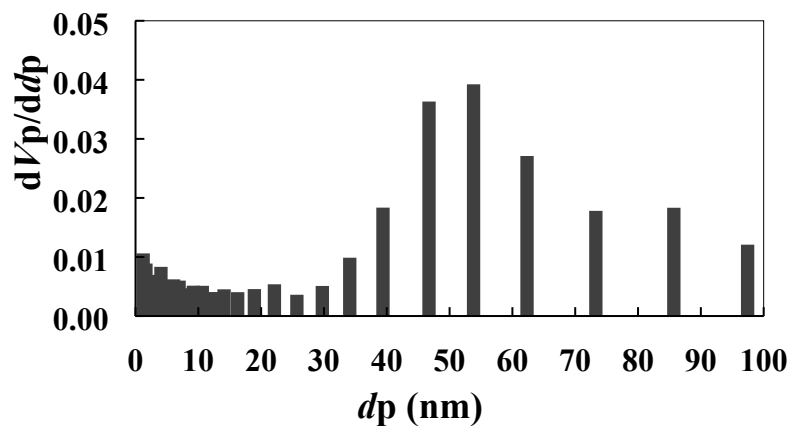

Figure SI.2. Pore size distribution of the particles prepared using 270 nm-sized PSL with PSL to melamine resin ratio of 1.6:1 and at a carbonization temperature of 800 °C resulted from Barrett-Joyner-Halenda analysis

## References

1. Y. Zhao, R. Nakamura, K. Kamiya, S. Nakanishi and K. Hashimoto, *Nat Commun*, 2013, **4**.
2. E. Fiset, T. E. Rufford, M. Seredych, T. J. Bandosz and D. Hulicova-Jurcakova, *Carbon*, 2015, **81**, 239-250.
3. H. Li, W. Kang, L. Wang, Q. Yue, S. Xu, H. Wang and J. Liu, *Carbon*, 2013, **54**, 249-257.
4. M. Li and J. Xue, *The Journal of Physical Chemistry C*, 2014, **118**, 2507-2517.
5. C. Pevida, T. Drage and C. E. Snape, *Carbon*, 2008, **46**, 1464-1474.
